# Supplementary material for: Acclimation responses of Arabidopsis thaliana to sustained phosphite treatments
Source: PubMed Central journal article supplement — J Exp Bot. 2013 Feb 11;64(6):1731–43. doi: 10.1093/jxb/ert037 (PMC3617837; doi:10.1093/jxb/ert037), 2013-02-11
Supplement: supp_ert037_jexbot090019_file001.pdf [file supp_ert037_jexbot090019_file001.pdf]

## Title: Acclimation responses of *Arabidopsis thaliana* to sustained phosphite treatments

Oliver Berkowitz<sup>1,2</sup>, Ricarda Jost<sup>2</sup>, Daniel O. Kollehn<sup>1</sup>, Ricarda Fenske<sup>3</sup>, Patrick M. Finnegan<sup>2</sup>, Philip A. O'Brien<sup>1</sup>, Giles E.St.J. Hardy<sup>1</sup>, Hans Lambers<sup>2</sup>

<sup>1</sup>Centre for Phytophthora Science and Management, School of Biological Sciences & Biotechnology, Murdoch University, Murdoch WA 6150, Australia; <sup>2</sup>School of Plant Biology and Institute of Agriculture, The University of Western Australia, Crawley WA 6009, Australia; <sup>3</sup>Metabolomics Australia, The University of Western Australia, Crawley WA 6009, Australia

## Supporting Data

**Table S1:** Sequences of primers used for gene expression analyses

| Target gene                  | forward primer sequence (5' – 3') | reverse primer sequence (5' – 3')   |
|------------------------------|-----------------------------------|-------------------------------------|
| <i>PDF2</i> (At1g13320)      | TTGGCCACGTAAATTTGATGTT            | GCAGCATATAGTTCCTCAGGTTCTAGA         |
| <i>UBC9</i> (At4g27960)      | GCAACGGGTCCTGCGCTACA              | CCATTGGATTGGTTTTTCGATTGCAGA         |
| <i>UPL7</i> (At3g53090)      | GGATAAAAGGTCTAGGTGCATAACAAGATGA   | TCTACGTGCTACAATACTCTTAAGCTTCCA      |
| <i>At4</i> (At5g03545)       | GATCGAAGTTGCCCAAACGA              | GAGCGATGAAGATTGCATGAAG              |
| <i>miRNA399d</i> (At2g34202) | CTCCTTTGGCAGAGAAGCATTTT           | GGTTGGATTACTGGGCGAATACT             |
| <i>PHO1</i> (At3g23430)      | GTGCTCATTCTCCACTCTGTAAAAGT        | GGGTCAGTCCTGTTCAGTCTCAT             |
| <i>PHO2</i> (At2g33770)      | CATCTCAAATGCTTTGGAGGCT            | CGAGCCGAGGGAGAGAAAAA                |
| <i>PHR1</i> (At4g28610)      | TGTAATACCTATCCCACCTTTCAAATC       | ATATCGGCCAGAACCATCAGAAAC            |
| <i>PHT1;1</i>                | CCAAAGGCAAGTCCCTTGAAGAACT         | AACAAAACCAAACATCGCACTCCAAATAA       |
| <i>PHT1;4</i>                | TTGCTCCTAATTTTCCTGATGCT           | TGTGCCGCGCAAATCT                    |
| <i>PAP1</i>                  | TTGAAGATCAGAGAATTCAGCAAGA         | CCGGTTTACCAGAGTGTATGCA              |
| <i>NMT3</i> (At1g48600)      | TGCTGGCTTGTCTTGGATATGT            | GCACCAAGAAGGAGTATCCTGATAA           |
| <i>SQD2</i> (At5g01220)      | ATCCGGTTTTTCCCTCCTGATC            | CCTTGTGGTTCTTGAAGCAATGT             |
| ASK11                        | TTCGTAAGGAGAATCAATGGGCT           | CATAATAAAGATGTAGACAAAGTTATCATAATCGA |

**Supporting Figure 1**

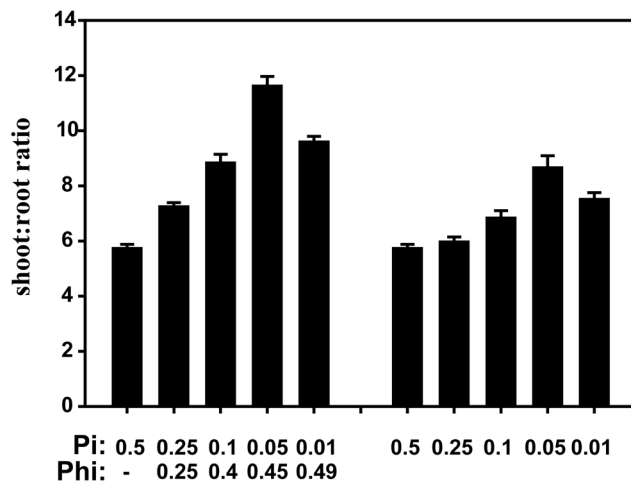

**Shoot : root ratios of plants under +Phi and -P treatments.**

The increase in shoot:root ratio observed for Phi treated plants is caused by the strong reduction in primary root biomass (Fig. 1). The slight increase also observed for the -P treatment is likely caused by the reduction in primary root growth characteristic under low P supply while the lateral roots were still developing. Therefore the laterals contributed little to overall root biomass at the time when tissue harvest was necessary.
